# Supplementary material for: Intracellular regulation of zinc by metal–organic framework-mediated genome editing for prostate cancer therapy
Source: Royal Society of Chemistry journal article supplement (doi:10.1039/d3bm00002h), 2023-01-01
Supplement: d3bm00002h1.pdf [file d3bm00002h1.pdf]

## Supporting Information for

### **Intracellular regulation of zinc by metal-organic framework-mediated genome editing for prostate cancer therapy**

Yanan Xue<sup>a,b,#</sup>, Honglin Tang<sup>a,b,#</sup>, Guangpeng Chen<sup>a</sup>, Yubin Pan<sup>a</sup>, Da Li<sup>\*,a</sup> and Yuan Ping<sup>\*,b,c</sup>

<sup>a</sup>Sir Run Run Shaw Hospital, School of Medicine, Zhejiang University, Hangzhou, 3100016, China.

<sup>b</sup>College of Pharmaceutical Sciences, Zhejiang University, Hangzhou, 310058, China.

<sup>c</sup>Liangzhu Laboratory, Zhejiang University Medical Center, Hangzhou 311121, China.

# These authors contributed equally to this work.

\* Corresponding author. Email: pingy@zju.edu.cn (Y.P.); lidaonconew@zju.edu.cn (D.L.)

## Supplementary Figure

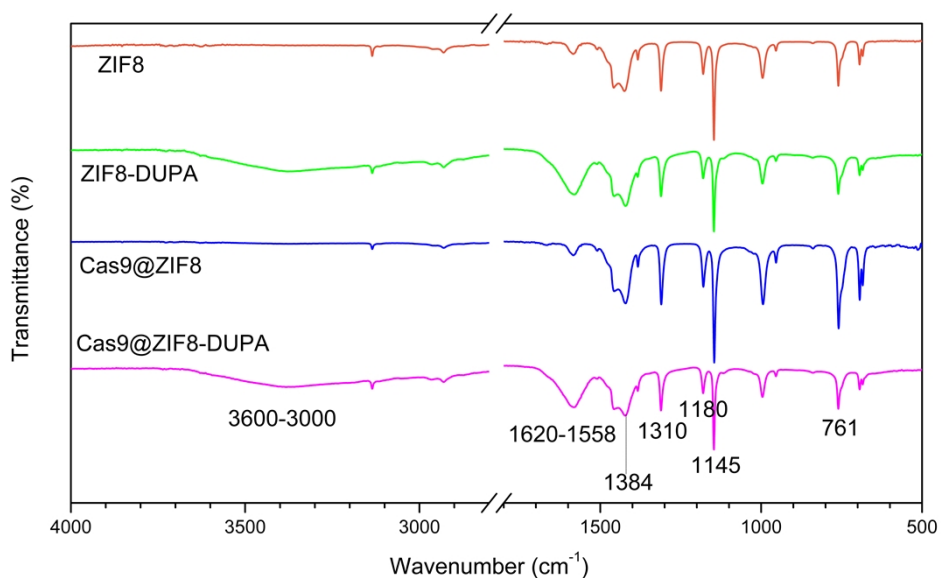

Fig. S1 FTIR patterns of ZIF8, ZIF8-DUPA, Cas9@ZIF8 and Cas9@ZIF8-DUPA.

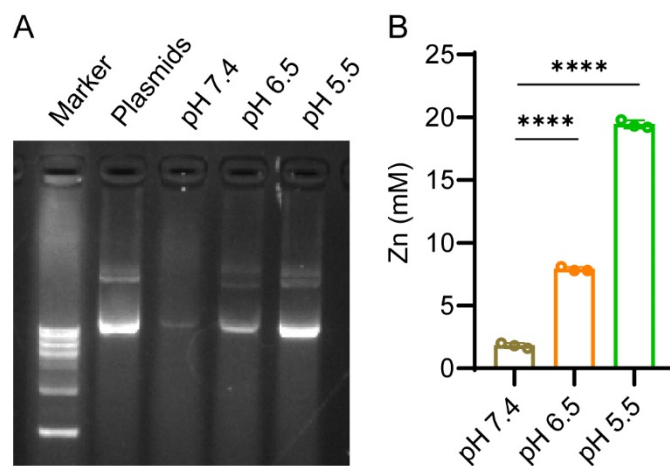

**Fig.S2 In vitro plasmids release study of Cas9@ZIF8 in various pH conditions.** (A) Agarose gel electrophoresis of the plasmids in supernatant of Cas9@ZIF8 nanoparticles in various pH conditions for 24h. (B) The zinc concentration of in supernatant of Cas9@ZIF8 nanoparticles in various pH conditions for 24h. Data represent mean  $\pm$  S.D. (n = 3, one-way ANOVA with a Tukey's post-hoc test, \*\*\*\* p < 0.0001).
